# Supplementary material for: Pocket closure and residual pockets after non‐surgical periodontal therapy: A systematic review and meta‐analysis
Source: PubMed Central journal article supplement — J Clin Periodontol. 2021 Nov 11;49(1):2–14. doi: 10.1111/jcpe.13547 (PMC9298904; doi:10.1111/jcpe.13547), 2021-11-11
Supplement: JCPE-49-2-s002.pdf [file JCPE-49-2-s002.pdf]

| Author, Year         | Study design<br>Sample size (N)<br>Setting & Operators' experience                                                 | Demographic data<br>Age (Mean ± SD, range)<br>Gender (M/F)<br>Smoking (Yes/No)                       | Baseline<br>FMPS % (Mean ± SD) Alternatively PI<br>FMBS % (Mean ± SD) Alternatively GI<br>Inclusion criteria                                                                                                                                                                                                                                                                                                                                                                             | Follow-up<br>FMPS % (Mean ± SD) Alternatively PI<br>FMBS % (Mean ± SD) Alternatively GI | Non-Surgical Treatment                                                                                                                                                                                                                                                                               | Follow up and Re-evaluation time (months)                                                                          | Harms and adverse effect & PROMs                                                                                                                                                                                                       | Number or percentage of pockets at baseline                                                                                                                           | Number or percentage of pockets at final follow up                                                                                                  |
|----------------------|--------------------------------------------------------------------------------------------------------------------|------------------------------------------------------------------------------------------------------|------------------------------------------------------------------------------------------------------------------------------------------------------------------------------------------------------------------------------------------------------------------------------------------------------------------------------------------------------------------------------------------------------------------------------------------------------------------------------------------|-----------------------------------------------------------------------------------------|------------------------------------------------------------------------------------------------------------------------------------------------------------------------------------------------------------------------------------------------------------------------------------------------------|--------------------------------------------------------------------------------------------------------------------|----------------------------------------------------------------------------------------------------------------------------------------------------------------------------------------------------------------------------------------|-----------------------------------------------------------------------------------------------------------------------------------------------------------------------|-----------------------------------------------------------------------------------------------------------------------------------------------------|
| Giannelli M, 2018    | Study Design: Split-mouth RCT<br>Sample size: 24<br>Setting & Experience: NR                                       | Age: 48.1<br>M/F: 14/10<br>Smokers/Non-smokers: 10/14 (0, 10-20 sig. 2, 2 no smokers, 12 no smokers) | FMPS: 26.5 ± 3.7<br>FMBS: 42 ± 4.6<br>Inclusion criteria: Chronic periodontitis; presence of ≥ 16 natural teeth with a minimum of 1 per quadrant; ≥ 2 interproximal sites with CAL ≥ 6 mm (not on same tooth) per quadrant; and, ≥ 1 interproximal site with PD ≥ 5 mm per quadrant                                                                                                                                                                                                      | FMPS: 8.2 ± 1.5<br>FMBS: 23.2 ± 2.1                                                     | Modality: NR<br>Pre-treatment supragingival scaling<br>YES<br>Instrumentation: Manual & US<br>Anesthesia: YES (if requested)<br>Mouthrinse: NR<br>Number of session: NR<br>Total time of treatment: NR<br>Span of treatment: NR                                                                      | Frequency of SPT: every 3 months<br>Re-evaluation: 12 months                                                       | Harms: 2 teeth lost in the follow up (don't know in which group)<br>3 absences after 1 week<br>3 absences in the follow up 1 patient fever during the second day 1 patient lost 1 day of work<br>PROMs: Preference for laser treatment | % of pockets<br>%PD ≥ 6 mm: 28.5 ± 2.9%<br>%PD ≥ 7: 12.9 ± 2.5%                                                                                                       | % of pockets<br>%PD ≥ 6 mm: 36.1 ± 3.9%<br>%PD ≥ 7: 5.7 ± 1.5%                                                                                      |
| Borges I, 2017       | Study Design: Parallel RCT<br>Sample size: 22<br>Setting & Experience: University; Periodontist                    | Age: 45.6 ± 8.0<br>M/F: 10/12<br>Smokers/Non-smokers: 0/22                                           | FMPS: 61.0 ± 16.3<br>FMBS: 67.9 ± 14.6<br>Inclusion criteria: Generalized Chronic Periodontitis: ≥ 30 years of age, ≥ 15 teeth, at least 2 of the sites with PD and clinical attachment level (CAL) ≥ 4 mm and bleeding on probing (BOP) and at least 2 interproximal sites with PD ≥ 5 mm and CAL ≥ 5 mm.                                                                                                                                                                               | FMPS: 26.0 ± 19.7<br>FMBS: 40.0 ± 17.4                                                  | Modality: OSFMSRP + re-evaluation of SRP removal of any residual calculus and monitoring compliance (during the second week)<br>YES<br>Instrumentation: Manual & US<br>Anesthesia: YES<br>Mouthrinse: NR<br>Number of session: 1 + follow-up<br>Total time of treatment: NR<br>Span of treatment: NR | Frequency of SPT: every 3 months<br>Re-evaluation: 12 months                                                       | Harms: allergy to microsilica in the test group<br>PROMs: NR                                                                                                                                                                           | % of pockets<br>%PD ≥ 4 mm: 42.0 ± 17.3 %                                                                                                                             | No. of pockets:<br>%PD ≥ 5 mm: 19.0 ± 14.5;<br>%PD ≥ 6 mm: 11.1 ± 11.5;<br>%PD ≥ 7 mm: 5.4 ± 5.5;<br>%PD ≥ 8 mm: 11.7 ± 9.3                         |
| Congaro R, 2017      | Study Design: Parallel RCT<br>Sample size: 26<br>Setting & Experience: University; Periodontist                    | Age: 42.59 ± 6.68<br>M/F: 10/16<br>Smokers/Non-smokers: 0/18                                         | FMPS: 20.37 ± 6.43<br>FMBS: 62.83 ± 27.80<br>Inclusion criteria: Clinical (at least one site) and radiographic (at least one site) chronic periodontitis                                                                                                                                                                                                                                                                                                                                 | FMPS: 20.74 ± 12.93<br>FMBS: 12.91 ± 10.01                                              | Modality: Staged<br>Pre-treatment supragingival scaling<br>YES<br>Instrumentation: Manual & US<br>Anesthesia: YES<br>Mouthrinse: NR<br>Number of session: NR<br>Total time of treatment: 2 days<br>Span of treatment: 2 days                                                                         | Frequency of SPT: 3, 6, 12 months<br>Re-evaluation: 12 months                                                      | Harms: 2 test group headache<br>2 control group headache<br>1 test group gastrointestinal disorders<br>1 control group fever<br>1 test group fever<br>1 test group respiratory disorders<br>1 control group bleeding<br>PROMs: NR      | No. of pockets:<br>%PD ≥ 6 mm: 35.8 ± 17.36<br>%PD ≥ 7 mm: 41.71 ± 19.91<br>%PD ≥ 8 mm: 10.81 ± 22.84<br>%PD ≥ 9 mm: 14.69 ± 22.84                                    | No. of pockets:<br>%PD ≥ 5 mm: 5.9 ± 3.71;<br>%PD ≥ 6 mm: 10.50 ± 6.85;<br>%PD ≥ 7 mm: 11.11 ± 11.55;<br>%PD ≥ 8 mm: 12.34 ± 8.15                   |
| Baehum W, 2016       | Study Design: Uncontrolled before-after study<br>Sample size: 149<br>Setting & Experience: University; Hygienist   | Age: 50.70<br>M/F: 73/76<br>Smokers/Non-smokers: 51/98                                               | FMPS: NR<br>FMBS: 30.3 ± 17.8<br>Inclusion criteria: NR                                                                                                                                                                                                                                                                                                                                                                                                                                  | FMPS: NR<br>FMBS: 20.7 ± 12.6                                                           | Modality: Staged<br>Pre-treatment supragingival scaling<br>YES<br>Instrumentation: Manual & US<br>Anesthesia: YES<br>Mouthrinse: NR<br>Number of session: 3-4<br>Total time of treatment: NR<br>Span of treatment: 3 weeks                                                                           | Frequency of SPT: 6 weeks after treatment, then every 3 months (SRP in PD ≥ 4 mm BoP+)<br>Re-evaluation: 12 months | Harms: NR<br>PROMs: NR                                                                                                                                                                                                                 | No. of pockets:<br>%PD ≥ 5 mm: 20.5 ± 22.7<br>%PD ≥ 7 mm: 3.3 ± 6.6                                                                                                   | No. of pockets:<br>%PD ≥ 5 mm: 10.3 ± 13.1;<br>%PD ≥ 7 mm: 0.8 ± 5.4                                                                                |
| Morales A, 2016      | Study Design: Parallel RCT<br>Sample size: 14<br>Setting & Experience: University; NR                              | Age: 46.9 ± 10.3<br>M/F: 7/7<br>Smokers/Non-smokers: 0/14                                            | FMPS: 52.1 ± 20.7<br>FMBS: 33.8 ± 16.1<br>Inclusion criteria: Chronic Periodontitis: ≥ 5 teeth with PD ≥ 5 mm and CAL ≥ 5 mm, 20% and extensive radiographically determined bone loss. Healthy non-bleeding non-inflamed interdental or female patients.<br>2) aged ≥ 35 years, 3) 14 natural teeth, excluding third molars, 4) presence of a 10 posterior teeth, and 5) previously untreated periodontitis.                                                                             | FMPS: 35.1 ± 11.4<br>FMBS: 25.4 ± 10.3                                                  | Modality: Staged<br>Pre-treatment supragingival scaling<br>NR<br>Instrumentation: Manual & US<br>Anesthesia: NR<br>Mouthrinse: NR<br>Number of session: 4-6<br>Total time of treatment: NR<br>Span of treatment: 4-6 weeks                                                                           | Frequency of SPT: every 3 months<br>Re-evaluation: 12 months                                                       | Harms: NR<br>PROMs: NR                                                                                                                                                                                                                 | % of pockets<br>%PD ≥ 5 mm: 53.8 ± 6.6%<br>%PD ≥ 6 mm: 33 ± 3.0%<br>%PD ≥ 7 mm: 13.2 ± 2%<br>%PD ≥ 8 mm: 14 ± 3%<br>%PD ≥ 9 mm: 1.4 ± 2.2%<br>%PD ≥ 10 mm: 0.7 ± 1.4% | % of pockets<br>%PD ≥ 5 mm: 13.4 ± 1.2%<br>%PD ≥ 6 mm: 0.7 ± 1.2%<br>%PD ≥ 7 mm: 0.3 ± 0.5%<br>%PD ≥ 8 mm: 1.3;<br>%PD ≥ 9 mm: 6;<br>%PD ≥ 10 mm: 4 |
| Giannelli M, 2015    | Study Design: Split-mouth RCT<br>Sample size: 26<br>Setting & Experience: University; Periodontist                 | Age: 46.1<br>M/F: 14/12<br>Smokers/Non-smokers: NR (heavy smokers > 10 cig excluded)                 | FMPS: NR<br>FMBS: 68.9 ± 2.9<br>Inclusion criteria: Chronic periodontitis; presence of ≥ 16 natural teeth with a minimum of 1 per quadrant; ≥ 2 interproximal sites with CAL ≥ 6 mm (not on same tooth) per quadrant; and, ≥ 1 interproximal site with PD ≥ 5 mm per quadrant                                                                                                                                                                                                            | FMPS: NR<br>FMBS: 37.0 ± 0.9                                                            | Modality: NR<br>Pre-treatment supragingival scaling<br>YES<br>Instrumentation: Manual & US<br>Anesthesia: YES (if requested)<br>Mouthrinse: NR<br>Number of session: NR<br>Total time of treatment: NR<br>Span of treatment: NR                                                                      | Frequency of SPT: every 3 months<br>Re-evaluation: 12 months                                                       | Harms: NR<br>PROMs: NR                                                                                                                                                                                                                 | % of pockets<br>%PD ≥ 6 mm: 32.7 ± 2.8%<br>%PD ≥ 7 mm: 7.1 ± 3.3%<br>%PD ≥ 8 mm: 10.2 ± 1.7%                                                                          | % of pockets<br>%PD ≥ 5 mm: 37.4 ± 4.6%<br>%PD ≥ 6 mm: 60.3 ± 4.4%<br>%PD ≥ 7 mm: 24.0 ± 0.9%                                                       |
| Gonçalves TEH, 2015  | Study Design: Uncontrolled before-after study<br>Sample size: 20<br>Setting & Experience: University; Periodontist | Age: 48.5 ± 9.3<br>M/F: 10/10<br>Smokers/Non-smokers: 0/20                                           | FMPS: 85.8 ± 9.7<br>FMBS: 53.63 ± 17.9<br>Inclusion criteria: diagnosis of generalized (Armitage 1999) as follows: 1) ≥ 50% of the sites with concomitant probing depth (PD) and clinical attachment level (CAL) ≥ 4 mm and a minimum of six teeth distributed in the different quadrants preventing at least one site with PD and CAL ≥ 5 mm at baseline                                                                                                                                | FMPS: 21.0 ± 13.2<br>FMBS: 14.9 ± 17.9                                                  | Modality: NR<br>Pre-treatment supragingival scaling<br>YES<br>Instrumentation: Manual & US<br>Anesthesia: YES<br>Mouthrinse: NR<br>Number of session: 4-6<br>Total time of treatment: 4-6 weeks<br>Span of treatment: 4-6 weeks                                                                      | Frequency of SPT: every 3 months<br>Re-evaluation: 12 months                                                       | Harms: NR<br>PROMs: NR                                                                                                                                                                                                                 | % of pockets<br>%PD ≥ 5 mm: 21.6 ± 10.4%<br>%PD ≥ 6 mm: 8.0 ± 4.1%                                                                                                    | % of pockets<br>%PD ≥ 5 mm: 17.6 ± 9.5%<br>%PD ≥ 6 mm: 1.9 ± 1.4%                                                                                   |
| Sanz-Sanchet I, 2015 | Study Design: Parallel RCT<br>Sample size: 21<br>Setting & Experience: University; Periodontist                    | Age: 56.8<br>M/F: 15/6<br>Smokers/Non-smokers: 7/14                                                  | FMPS: 60.53 ± 14.2<br>FMBS: 65.44 ± 14.2<br>Inclusion criteria: Chronic periodontitis based on the presence of 4 teeth per quadrant with PD ≥ 4.5 mm and 30% to 50% radiographic bone loss to ≥ 30%                                                                                                                                                                                                                                                                                      | FMPS: 24.62 ± 7.5<br>FMBS: 30.61 ± 9.1                                                  | Modality: OSFMSRP<br>Pre-treatment supragingival scaling<br>NR<br>Instrumentation: US<br>Anesthesia: YES (if requested)<br>Mouthrinse: NR<br>Number of session: 2<br>Total time of treatment: 1.5 - 2 h<br>Span of treatment: 1 week                                                                 | Frequency of SPT: every 3 months<br>Re-evaluation: 12 months                                                       | Harms: NR<br>PROMs: NR                                                                                                                                                                                                                 | No. of pockets<br>%PD ≥ 5 mm: 57.2 ± 6.5;<br>%PD ≥ 6 mm: 10.3 ± 1.0                                                                                                   | No. of pockets<br>%PD ≥ 5 mm: 37.4 ± 6.8;<br>%PD ≥ 6 mm: 24.0 ± 0.5                                                                                 |
| Tekce M, 2015        | Study Design: Parallel RCT<br>Sample size: 20<br>Setting & Experience: University; NR                              | Age: 41.40 ± 8.86<br>M/F: 11/9<br>Smokers/Non-smokers: 0/20                                          | PI: 2.31 ± 0.41<br>FMBS: 88.65 ± 4.11<br>Inclusion criteria: Chronic periodontitis patients with radiographically detected horizontal bone loss (Armitage 1999), ≥ 2 teeth ≥ 1 approved PD ≥ 7 mm and a 4 of ≥ 2 in each quadrant.                                                                                                                                                                                                                                                       | PI: 1.39 ± 0.20<br>FMBS: 19.05 ± 4.84                                                   | Modality: Staged<br>Pre-treatment supragingival scaling<br>YES<br>Instrumentation: Manual & US<br>Anesthesia: NR<br>Mouthrinse: NR<br>Number of session: 2<br>Total time of treatment: NR<br>Span of treatment: 1 week                                                                               | Frequency of SPT: NR<br>Re-evaluation: 12 months                                                                   | Harms: NR<br>PROMs: NR                                                                                                                                                                                                                 | % of pockets<br>%PD ≥ 5 mm: 79.94 ± 8.7%<br>%PD ≥ 6 mm: 47.42 ± 5.57%<br>%PD ≥ 7 mm: 16.12 ± 6.52 %                                                                   | % of pockets<br>%PD ≥ 5 mm: 48.87 ± 11.52%<br>%PD ≥ 6 mm: 14.1 ± 4.38%<br>%PD ≥ 7 mm: 1.73 ± 2.49%                                                  |
| Shiloah I, 2014      | Study Design: Parallel RCT<br>Sample size: 12<br>Setting & Experience: University; NR                              | Age: 48.83<br>M/F: 7/5<br>Smokers/Non-smokers: 12                                                    | FMPS: NR<br>FMBS: 59.15 ± 4.63<br>Inclusion criteria: Chronic periodontitis with inflammation, probing depths of 5 mm and attachment loss ≥ 2 mm in at least four teeth, at least one site in each quadrant exhibiting the above criteria to meet the study objectives                                                                                                                                                                                                                   | FMPS: NR<br>FMBS: 16.56                                                                 | Modality: Staged<br>Pre-treatment supragingival scaling<br>NR<br>Instrumentation: NR<br>Anesthesia: NR<br>Mouthrinse: NR<br>Number of session: NR<br>Total time of treatment: NR<br>Span of treatment: NR                                                                                            | Frequency of SPT: every 3 months<br>Re-evaluation: 12 months                                                       | Harms: NR<br>PROMs: NR                                                                                                                                                                                                                 | %PD ≥ 3 mm: 58.49 ± 24.39%<br>%PD ≥ 4 mm: 35.36 ± 17.89%<br>%PD ≥ 5 mm: 5.84 ± 9.23%                                                                                  | %PD ≥ 3 mm: 65.61 ± 19.60%<br>%PD ≥ 4 mm: 30.54 ± 17.99%<br>%PD ≥ 5 mm: 3.79 ± 6.09%                                                                |
| Feres M, 2013        | Study Design: Parallel RCT<br>Sample size: 40<br>Setting & Experience: University; Periodontist                    | Age: 45.8 ± 8.54<br>M/F: 12/28<br>Smokers/Non-smokers: 0/40                                          | FMPS: 78.9 ± 15.6<br>FMBS: 70.6 ± 23.8<br>Inclusion criteria: Generalized Chronic Periodontitis: ≥ 30 years of age and ≥ 6 teeth with at ≥ 5 mm each with PD ≥ 5 mm and CAL ≥ 5 mm, as well as ≥ 30% of the sites with PD and CAL ≥ 4 mm and BOP+.                                                                                                                                                                                                                                       | FMPS: 38.0 ± 24.2<br>FMBS: 23.5 ± 25.8                                                  | Modality: Staged<br>Pre-treatment supragingival scaling<br>NR<br>Instrumentation: Manual & US<br>Anesthesia: YES<br>Mouthrinse: NR<br>Number of session: 4-6<br>Total time of treatment: 4-6 h<br>Span of treatment: 2 weeks                                                                         | Frequency of SPT: every 3 months<br>Re-evaluation: 12 months                                                       | Harms: none<br>PROMs: NR                                                                                                                                                                                                               | % of pockets<br>%PD ≥ 5 mm: 40.8 ± 20.7%                                                                                                                              | % of pockets<br>%PD ≥ 5 mm: 12.0 ± 11.4 %                                                                                                           |
| Menzik MJ, 2012      | Study Design: Parallel RCT<br>Sample size: 15<br>Setting & Experience: University; Periodontist                    | Age: 27.6 ± 3.5<br>M/F: 11/4<br>Smokers/Non-smokers: 0/15                                            | FMPS: 62.7 ± 22.4<br>FMBS: 63.8 ± 21.3<br>Inclusion criteria: Diagnosis of Generalized Aggressive Periodontitis: ≥ 30 years of age and ≥ 6 periodontal teeth, including incisors and/or first molars, with ≥ 1 mm each with PD ≥ 5 mm and CAL ≥ 5 mm; ≥ 6 teeth other than first molars and incisors with at least 2 mm each with PD ≥ 5 mm and CAL ≥ 5 mm; familial aggregation                                                                                                         | FMPS: 33.3 ± 13.2<br>FMBS: 13.7 ± 10.3                                                  | Modality: Staged<br>Pre-treatment supragingival scaling<br>YES<br>Instrumentation: Manual & US<br>Anesthesia: YES<br>Mouthrinse: NR<br>Number of session: 4-6<br>Total time of treatment: 4-6 h<br>Span of treatment: 2 weeks                                                                        | Frequency of SPT: every 3 months<br>Re-evaluation: 12 months                                                       | Harms: none<br>PROMs: NR                                                                                                                                                                                                               | % of pockets<br>%PD ≥ 5 mm: 30.9 ± 11.1%                                                                                                                              | % of pockets<br>%PD ≥ 5 mm: 16.0 ± 8.8%                                                                                                             |
| Wong RMS, 2012       | Study Design: Uncontrolled before-after study<br>Sample size: 65<br>Setting & Experience: University; Hygienist    | Age: 47.4 ± 6.8<br>M/F: NR<br>Smokers/Non-smokers: 0/65                                              | FMPS: 72.8<br>FMBS: 86.3<br>Inclusion criteria: ≥ 15 teeth excluding third molars and teeth planned for extraction and ≥ 1 mm each with PD ≥ 5 mm in each quadrant.                                                                                                                                                                                                                                                                                                                      | FMPS: 25.4<br>FMBS: 32.0                                                                | Modality: Staged<br>Pre-treatment supragingival scaling<br>YES<br>Instrumentation: NR<br>Anesthesia: NR<br>Mouthrinse: NR<br>Number of session: 4-6<br>Total time of treatment: NR<br>Span of treatment: 4 weeks                                                                                     | Frequency of SPT: 1 month then every 3 months<br>Re-evaluation: 12 months                                          | Harms: none<br>PROMs: NST increase quality of life                                                                                                                                                                                     | % of pockets<br>%PD ≥ 5 mm: 25.9%<br>%PD ≥ 6 mm: 11.2%                                                                                                                | % of pockets<br>%PD ≥ 5 mm: 0.9%<br>%PD ≥ 6 mm: 1.0%                                                                                                |
| Rosa EF, 2011        | Study Design: Uncontrolled before-after study<br>Sample size: 35<br>Setting & Experience: University; Periodontist | Age: 49.2 ± 7.0<br>M/F: 20/15<br>Smokers/Non-smokers: 35/0                                           | FMPS: 81.1 ± 19.8<br>FMBS: 19.8 ± 13.8<br>Inclusion criteria: Chronic Periodontitis: ≥ 30% of teeth with proximal CAL ≥ 5 mm                                                                                                                                                                                                                                                                                                                                                             | FMPS: 72.09 ± 27.09<br>FMBS: 20.04 ± 13.15                                              | Modality: Staged<br>Pre-treatment supragingival scaling<br>YES<br>Instrumentation: Manual & US<br>Anesthesia: NR<br>Mouthrinse: NR<br>Number of session: 4-6<br>Total time of treatment: NR<br>Span of treatment: 4-6 weeks                                                                          | Frequency of SPT: every 3 months<br>Re-evaluation: 12 months                                                       | Harms: NR<br>PROMs: NR                                                                                                                                                                                                                 | % of pockets<br>%PD ≥ 4 mm: 54.9 ± 25.3%                                                                                                                              | %PD ≥ 4 mm: 21.5 ± 16.1%                                                                                                                            |
| Rosa EF, 2011        | Study Design: Uncontrolled before-after study<br>Sample size: 17<br>Setting & Experience: University; Periodontist | Age: 48.9 ± 6.1<br>M/F: 7/10<br>Smokers/Non-smokers: 0/17                                            | FMPS: 84.3 ± 23.7<br>FMBS: 25.6 ± 17.6<br>Inclusion criteria: Chronic Periodontitis: ≥ 30% of teeth with proximal CAL ≥ 5 mm                                                                                                                                                                                                                                                                                                                                                             | FMPS: 58.62 ± 21.97<br>FMBS: 20.41 ± 11.63                                              | Modality: Staged<br>Pre-treatment supragingival scaling<br>YES<br>Instrumentation: Manual & US<br>Anesthesia: NR<br>Mouthrinse: NR<br>Number of session: 4-6<br>Total time of treatment: NR<br>Span of treatment: 4-6 weeks                                                                          | Frequency of SPT: every 3 months<br>Re-evaluation: 12 months                                                       | Harms: NR<br>PROMs: NR                                                                                                                                                                                                                 | % of pockets<br>%PD ≥ 4 mm: 47.4 ± 16.9%                                                                                                                              | % of pockets<br>%PD ≥ 4 mm: 10.2 ± 7.4%                                                                                                             |
| Sampain E, 2011      | Study Design: Parallel RCT<br>Sample size: 20<br>Setting & Experience: University; NR                              | Age: 43.52 ± 5.905<br>M/F: 11/9<br>Smokers/Non-smokers: 0/15                                         | FMPS: 82.70 ± 12.91<br>FMBS: 81.93 ± 1.86<br>Inclusion criteria: Chronic Periodontitis: ≥ 3 non adjacent sites with PD ≥ 7 mm and CAL ≥ 7 mm ± 2 non adjacent sites with PD ≥ 5 mm and CAL ≥ 5 mm; ≥ 20% of sites with PD ≥ 5 mm and CAL ≥ 5 mm                                                                                                                                                                                                                                          | FMPS: 36.36 ± 27.29<br>FMBS: 9.47 ± 7.71                                                | Modality: Staged<br>Pre-treatment supragingival scaling<br>NR<br>Instrumentation: Manual (manually) bid, for 2 months<br>Mouthrinse: NR<br>Number of session: 4-6<br>Total time of treatment: 8-12 h<br>Span of treatment: 2 weeks                                                                   | Frequency of SPT: NR<br>Re-evaluation: 12 months                                                                   | Harms: 2 test group diarrhea<br>1 control group headache<br>3 control group stomatitis<br>1 test group general unwellness<br>1 control group general unwellness<br>PROMs: NR                                                           | % of pockets<br>%PD ≥ 5 mm: 44.52 ± 13.10%<br>%PD ≥ 6 mm: 15.63 ± 13.65%<br>%PD ≥ 7 mm: 10.8 ± 4.50%                                                                  | % of pockets<br>%PD ≥ 5 mm: 37.47 ± 12.79%<br>%PD ≥ 6 mm: 20.4 ± 13.5 %<br>%PD ≥ 7 mm: 10.6 ± 10.8%                                                 |
| Jonsson et al., 2010 | Study Design: Parallel RCT<br>Sample size: 55<br>Setting & Experience: University; Hygienist                       | Age: 50.1 ± 10.3<br>M/F: 30/25<br>Smokers/Non-smokers: 20/36                                         | FMPS: 75 ± 18<br>FMBS: 75 ± 18<br>Inclusion criteria: Chronic periodontitis were radiologically to the study after an examination including full-mouth probing and radiographic evaluation, and some pre-treatment active or tooth extraction. Periodontal diagnosis: slight 9%, moderate 37%, advanced 54%                                                                                                                                                                              | FMPS: 28 ± 13<br>FMBS: 29 ± 14                                                          | Modality: Staged<br>Pre-treatment supragingival scaling<br>NR<br>Instrumentation: Manual (manually) bid, for 2 months<br>Mouthrinse: NR<br>Number of session: 1-5<br>Total time of treatment: NR<br>Span of treatment: NR                                                                            | Frequency of SPT: every 3 months<br>Re-evaluation: 12 months                                                       | Harms: NR<br>PROMs: NR                                                                                                                                                                                                                 | % of pockets<br>%PD ≥ 5 mm: 49%<br>%PD ≥ 6 mm: 33% ± 10.0%                                                                                                            | % of pockets<br>%PD ≥ 5 mm: 12.2 ± 10.8%                                                                                                            |
| Wan CP, 2009         | Study Design: Uncontrolled before-after study<br>Sample size: 20<br>Setting & Experience: University; Hygienist    | Age: 46.2<br>M/F: 20/0<br>Smokers/Non-smokers: 20/0                                                  | FMPS: 77.36 ± 10.96<br>FMBS: 54.32 ± 13.68<br>Inclusion criteria: Chronic Periodontitis: 35 ± age ≥ 64 chinese adults ≥ 16 teeth with ≥ 1 tooth having PD ≥ 5 mm in each quadrant, excluding the third molars                                                                                                                                                                                                                                                                            | FMPS: 33.79 ± 15.07<br>FMBS: 26.91 ± 10.85                                              | Modality: Staged<br>Pre-treatment supragingival scaling<br>NR<br>Instrumentation: NR<br>Anesthesia: NR<br>Mouthrinse: NR<br>Number of session: 4-6<br>Total time of treatment: NR<br>Span of treatment: 8 weeks                                                                                      | Frequency of SPT: NR<br>Re-evaluation: 12 months                                                                   | Harms: NR<br>PROMs: NR                                                                                                                                                                                                                 | % of pockets<br>%PD ≥ 5 mm: 90.8 ± 9.69 %                                                                                                                             | % of pockets<br>%PD ≥ 5 mm: 3.37 ± 3.24 %                                                                                                           |
| Wan CP, 2009         | Study Design: Uncontrolled before-after study<br>Sample size: 20<br>Setting & Experience: University; Hygienist    | Age: 45.0<br>M/F: 20/0<br>Smokers/Non-smokers: 0/20                                                  | FMPS: 75.45 ± 14.95<br>FMBS: 73.45 ± 21.02<br>Inclusion criteria: Chronic Periodontitis: 35 ± age ≥ 64 chinese adults ≥ 16 teeth with ≥ 1 tooth having PD ≥ 5 mm in each quadrant, excluding the third molars                                                                                                                                                                                                                                                                            | FMPS: 26.55 ± 14.19<br>FMBS: 24.92 ± 10.44                                              | Modality: Staged<br>Pre-treatment supragingival scaling<br>NR<br>Instrumentation: NR<br>Anesthesia: YES<br>Mouthrinse: NR<br>Number of session: 4-6<br>Total time of treatment: NR<br>Span of treatment: 8 weeks                                                                                     | Frequency of SPT: NR<br>Re-evaluation: 12 months                                                                   | Harms: NR<br>PROMs: NR                                                                                                                                                                                                                 | % of pockets<br>%PD ≥ 5 mm: 11.43 ± 12.14 %                                                                                                                           | %PD ≥ 5 mm: 0.08 ± 0.04 %                                                                                                                           |
| Yen CA, 2008         | Study Design: Parallel RCT<br>Sample size: 47<br>Setting & Experience: NR, NR                                      | Age: 47.3 ± 9.2<br>M/F: 25/22<br>Smokers/Non-smokers: 17/28 (2 missing)                              | FMPS: 58.7<br>FMBS: 43.6<br>Inclusion criteria: Chronic Periodontitis: ≥ 16 teeth, ≥ 2 of which were molars; ≥ 4 teeth with PD ≥ 5 mm and CAL loss > 2 mm were present with ≥ 2 interproximal sites with radiographic evidence of bone loss.                                                                                                                                                                                                                                             | FMPS: 17.5<br>FMBS: 17.4                                                                | Modality: Staged<br>Pre-treatment supragingival scaling<br>NR<br>Instrumentation: NR<br>Anesthesia: NR<br>Mouthrinse: NR<br>Number of session: NR<br>Total time of treatment: NR<br>Span of treatment: 1-2 weeks                                                                                     | Frequency of SPT: NR<br>Re-evaluation: 12 months                                                                   | Harms: 1 control group skin rash<br>PROMs: NR                                                                                                                                                                                          | % of pockets<br>%PD ≥ 3 mm: 75.10%                                                                                                                                    | % of pockets<br>%PD ≥ 3 mm: 87.84%                                                                                                                  |
| Ramberg P, 2001      | Study Design: Non Randomized CT<br>Sample size: 115 (89 SRP; 35 SRP + AB)<br>Setting & Experience: University; NR  | Age: 42.1 (23-66)<br>M/F: 56/43<br>Smokers/Non-smokers: 56/56                                        | FMPS: 28 ± 28<br>FMBS: 67 ± 32<br>Inclusion criteria: ≥ 20 years of age and have at least 16 teeth out of which at least 2 to be molars. Subjects were excluded with systemic conditions which required antibiotic coverage for non-surgical periodontal procedures, were pregnant, allergic to tetracycline or had had antibiotic treatment during the previous 6 months                                                                                                                | FMPS: 5<br>FMBS: 31                                                                     | Modality: Staged<br>Pre-treatment supragingival scaling<br>NO<br>Instrumentation: NR<br>Anesthesia: YES<br>Mouthrinse: CHX 0.2% bid during NST<br>Number of session: 4-6<br>Total time of treatment: 4-6 h<br>Span of treatment: 3 weeks                                                             | Frequency of SPT: every 3/4 months<br>Re-evaluation: 12, 36,45,156 months                                          | Harms: NR<br>PROMs: NR                                                                                                                                                                                                                 | % of pockets<br>%PD ≥ 3 mm: 49%<br>%PD ≥ 4 mm: 39%<br>%PD ≥ 5 mm: 12%                                                                                                 | % of pockets<br>%PD ≥ 3 mm: 67%<br>%PD ≥ 4 mm: 29%<br>%PD ≥ 5 mm: 4%                                                                                |
| Roeling B, 2001      | Study Design: Non Randomized CT<br>Sample size: 148 (Only non molar teeth)<br>Setting & Experience: University; NR | Age: 44.5 ± 8.6<br>M/F: 56/43<br>Smokers/Non-smokers: NR                                             | FMPS: 30 ± 29<br>FMBS: 66 ± 34<br>Inclusion criteria: Had a minimum of 8 non-molar teeth, exhibited periodontal lesions characterized by probing depths of ≥ 4 mm and CAL loss ≥ 2 mm in each quadrant, and radiographic bone loss exceeding 40% of the same tooth.                                                                                                                                                                                                                      | FMPS: 10 ± 12<br>FMBS: 25 ± 21                                                          | Modality: Staged<br>Pre-treatment supragingival scaling<br>NO<br>Instrumentation: US<br>Anesthesia: YES<br>Mouthrinse: NO<br>Number of session: 4-6<br>Total time of treatment: 4-6 h<br>Span of treatment: 4-6 weeks                                                                                | Frequency of SPT: every 3/4 months<br>Re-evaluation: 12, 36,45,156 months                                          | Harms: NR<br>PROMs: NR                                                                                                                                                                                                                 | % of pockets<br>%PD ≥ 3 mm: 54 ± 23%<br>%PD ≥ 4 mm: 33 ± 10%<br>%PD ≥ 5 mm: 11.8 ± 1%                                                                                 | % of pockets<br>%PD ≥ 3 mm: 37 ± 19%<br>%PD ≥ 4 mm: 21 ± 14%<br>%PD ≥ 5 mm: 7%                                                                      |
| Seriso G, 2001       | Study Design: Parallel RCT<br>Sample size: 32 (Only non molar teeth)<br>Setting & Experience: University; NR       | Age: 43.8 ± 8.9<br>M/F: 15/17<br>Smokers/Non-smokers: NR                                             | FMPS: 35 ± 33<br>FMBS: 68 ± 31<br>Inclusion criteria: Generalized gingival inflammation: a minimum of 12 non-molar teeth with deep pockets (≥ 6 mm) and with ≥ 2 mm alveolar bone loss                                                                                                                                                                                                                                                                                                   | FMPS: 30 ± 13<br>FMBS: 30                                                               | Modality: Staged<br>Pre-treatment supragingival scaling<br>NR<br>Instrumentation: US<br>Anesthesia: YES<br>Mouthrinse: CHX 0.2% bid, for 2 months<br>Number of session: 4-6<br>Total time of treatment: NR<br>Span of treatment: 8 weeks                                                             | Frequency of SPT: every 3/4 months<br>Re-evaluation: 12, 36,45,156 months                                          | Harms: NR<br>PROMs: NR                                                                                                                                                                                                                 | % of pockets<br>%PD ≥ 3 mm: 55%<br>%PD ≥ 4 mm: 35%<br>%PD ≥ 5 mm: 30%                                                                                                 | % of pockets<br>%PD ≥ 3 mm: 55%<br>%PD ≥ 4 mm: 29%<br>%PD ≥ 5 mm: 10%                                                                               |
| Westfeldt E, 1998    | Study Design: Split-mouth RCT<br>Sample size: 12<br>Setting & Experience: Hospital; NR                             | Age: 40-65<br>M/F: NR<br>Smokers/Non-smokers: 9/3                                                    | FMPS: 63 ± 15<br>FMBS: 63 ± 14<br>Inclusion criteria: No known systemic disease; *at least 10 remaining teeth in each jaw; *advance periodontal disease, group 4 according to the classification system suggested by Haggstrom & Jordan (1972); *willing to return to the clinic during a three year period maintaining and performing periodontal therapy.                                                                                                                              | FMPS: 12 ± 13<br>FMBS: 10 ± 8                                                           | Modality: Staged<br>Pre-treatment supragingival scaling<br>YES<br>Instrumentation: NR<br>Anesthesia: NR<br>Mouthrinse: NR<br>Number of session: 4-5<br>Total time of treatment: NR<br>Span of treatment: NR                                                                                          | Frequency of SPT: every 3 months<br>Re-evaluation: 36 months                                                       | Harms: NR<br>PROMs: NR                                                                                                                                                                                                                 | % of pockets<br>%PD ≥ 3 mm: 54 ± 11%<br>%PD ≥ 6 mm: 8 ± 7.4%                                                                                                          | %PD ≥ 3 mm: 38 ± 12 %<br>%PD ≥ 6 mm: 5.3 ± 5.6%                                                                                                     |
| Timmerman ME, 1996   | Study Design: Parallel RCT<br>Sample size: 20<br>Setting & Experience: Hospital; NR                                | Age: 44.0<br>M/F: 7/13<br>Smokers/Non-smokers: NR                                                    | PI: 1.96<br>PDI: 2.75<br>Inclusion criteria: At least 1 periodontal pocket of ≥ 5 mm combined with inter- proximal attachment loss of ≥ 7 mm and radiographic evidence of alveolar bone loss in one site per quadrant. At least 3 natural teeth should be present in each quadrant. The average Gingival Index (Visual aspect only, Loel & Silness, 1963) on these teeth had to be greater than 1. The plaque index (Silness & Loe, 1964) for the approximal surfaces had to be at least | PI: 0.61<br>PDI: 1.01                                                                   | Modality: Staged half month<br>Pre-treatment supragingival scaling<br>NO<br>Instrumentation: Manual & US<br>Anesthesia: YES (if requested)<br>Mouthrinse: NR<br>Number of session: 2<br>Total time of treatment: 1h<br>Span of treatment: NR                                                         | Frequency of SPT: every 3 months<br>Re-evaluation: 12 months                                                       | Harms: 1 tooth extracted in the test group for endodontic reasons<br>PROMs: NR                                                                                                                                                         | % of pockets<br>%PD ≥ 3 mm: 45%<br>%PD ≥ 4 mm: 25%<br>%PD ≥ 5 mm: 15%                                                                                                 | % of pockets<br>%PD ≥ 3 mm: 55%<br>%PD ≥ 4 mm: 60%<br>%PD ≥ 5 mm: 16%<br>%PD ≥ 6 mm: 4%                                                             |
| Sato K, 1993         | Study Design: Split-mouth RCT<br>Sample size: 62<br>Setting & Experience: Hospital; Hygienist                      | Age: NR<br>M/F: NR<br>Smokers/Non-smokers: NR                                                        | FMPS: 18<br>FMBS: 19<br>Inclusion criteria: NR                                                                                                                                                                                                                                                                                                                                                                                                                                           | FMPS: 18<br>FMBS: 10                                                                    | Modality: Staged<br>Pre-treatment supragingival scaling<br>NO<br>Instrumentation: NR<br>Anesthesia: NR<br>Mouthrinse: NR<br>Number of session: as necessary<br>Total time of treatment: as necessary<br>Span of treatment: 8 weeks                                                                   | Frequency of SPT: every 3 months<br>Re-evaluation: 12 months                                                       | Harms: NR<br>PROMs: NR                                                                                                                                                                                                                 | % of pockets<br>%PD ≥ 3 mm: 49%                                                                                                                                       | % of pockets<br>%PD ≥ 3 mm: 93%                                                                                                                     |
| Becker W, 1988       | Study Design: Split-mouth RCT<br>Sample size: 16<br>Setting & Experience: Hospital; Hygienist + Periodontist       | Age: 41<br>M/F: 11/5<br>Smokers/Non-smokers: NR                                                      | PI: 1.47<br>GI: 1.92<br>Inclusion criteria: Two or more sites equal to or greater than 6 mm or 4 mm or 3 mm in one site per quadrant. The anterior seven teeth of the dentitions. Posterior teeth were not included in the study.                                                                                                                                                                                                                                                        | PI: 0.42<br>GI: 0.75                                                                    | Modality: 1 quadrant only<br>Pre-treatment supragingival scaling<br>YES<br>Instrumentation: Manual & US<br>Anesthesia: YES<br>Mouthrinse: NO<br>Number of session: 1<br>Total time of treatment: 1 h<br>Span of treatment: 1 day                                                                     | Frequency of SPT: every 3 months<br>Re-evaluation: 12 months                                                       | Harms: NR<br>PROMs: NR                                                                                                                                                                                                                 | % of pockets<br>%PD ≥ 3 mm: 45%<br>%PD ≥ 4 mm: 60%<br>%PD ≥ 5 mm: 71%                                                                                                 | % of pockets<br>%PD ≥ 3 mm: 27%<br>%PD ≥ 4 mm: 27%<br>%PD ≥ 5 mm: 25%                                                                               |
| Lindhe J, 1985       | Study Design: Split-mouth RCT<br>Sample size: 15<br>Setting & Experience: Hospital; NR                             | Age: 52<br>M/F: NR<br>Smokers/Non-smokers: NR                                                        | FMPS: 80<br>FMBS: 91<br>Inclusion criteria: Advanced periodontitis: at least 4 sites per jaw quadrant had at least 4 sites per jaw quadrant with probing depths of ≥ 6 mm. They had not received any antibiotics in the past 6 months                                                                                                                                                                                                                                                    | FMPS: 22<br>FMBS: 21                                                                    | Modality: Staged<br>Pre-treatment supragingival scaling<br>NO<br>Instrumentation: Manual & US<br>Anesthesia: YES<br>Mouthrinse: NR<br>Number of session: 1<br>Span of treatment: NR                                                                                                                  | Frequency of SPT: every 3 months<br>Re-evaluation: 12 months                                                       | Harms: NR<br>PROMs: NR                                                                                                                                                                                                                 | % of pockets<br>%PD ≥ 3 mm:                                                                                                                                           |                                                                                                                                                     |
