# Supplementary material for: Pocket closure and residual pockets after non‐surgical periodontal therapy: A systematic review and meta‐analysis
Source: PubMed Central journal article supplement — J Clin Periodontol. 2021 Nov 11;49(1):2–14. doi: 10.1111/jcpe.13547 (PMC9298904; doi:10.1111/jcpe.13547), 2021-11-11
Supplement: JCPE-49-2-s003.pdf [file JCPE-49-2-s003.pdf]

|          |                                                    |                                                                                                                                                                                      | Ramberg et al 2001 | Rosling et al 2001 |
|----------|----------------------------------------------------|--------------------------------------------------------------------------------------------------------------------------------------------------------------------------------------|--------------------|--------------------|
| Domain 1 | Bias due to confounding                            | measurements of outcomes were made at sufficient pre-intervention time points to permit characterization of pre-intervention trends and patterns;                                    | NI                 | NI                 |
|          |                                                    | there are extraneous events or changes in context around the time of the intervention that could have influenced the outcome;                                                        | PN                 | PN                 |
|          |                                                    | pre-intervention trends and patterns in outcomes were analysed appropriately and found to be similar across the intervention and comparator groups.                                  | PY                 | PY                 |
|          |                                                    | Risk of bias judgement                                                                                                                                                               | Moderate risk      | Moderate risk      |
| Domain 2 | Bias in selection of participants into the study   | 2.1. Was selection of participants into the study (or into the analysis) based on participant characteristics observed after the start of intervention?<br>If N/PN to 2.1: go to 2.4 | N                  | N                  |
|          |                                                    | 2.2. If Y/PY to 2.1: Were the post-intervention variables that influenced selection likely to be associated with intervention?                                                       |                    |                    |
|          |                                                    | 2.3 If Y/PY to 2.2: Were the post-intervention variables that influenced selection likely to be influenced by the outcome or a cause of the outcome?                                 |                    |                    |
|          |                                                    | 2.4. Do start of follow-up and start of intervention coincide for most participants?                                                                                                 | PY                 | PY                 |
|          |                                                    | 2.5. If Y/PY to 2.2 and 2.3, or N/PN to 2.4: Were adjustment techniques used that are likely to correct for the presence of selection biases?                                        |                    |                    |
|          |                                                    | Risk of bias judgement                                                                                                                                                               | Low risk           | Low risk           |
| Domain 3 | Bias in classification of interventions            | Whether classification of time points as before versus after intervention could have been influenced by post-intervention outcome data.                                              | N                  | N                  |
| Domain 4 | Bias due to deviations from intended interventions | 4.1. Were there deviations from the intended intervention beyond what would be expected in usual practice?                                                                           | N                  | N                  |
|          |                                                    | 4.2. If Y/PY to 4.1: Were these deviations from intended intervention unbalanced between groups and likely to have affected the outcome?                                             |                    |                    |
|          |                                                    | Risk of bias judgement                                                                                                                                                               | Low risk           | Low risk           |
| Domain 5 | Bias due to missing data                           | Whether outcome data were missing for whole clusters as well as for individual participants.                                                                                         | N                  | N                  |
|          |                                                    | Risk of bias judgement                                                                                                                                                               | Low risk           | Low risk           |
| Domain 6 | Bias in measurement of outcomes                    | methods of outcome assessment were comparable across intervention groups and before and after the intervention; and                                                                  | Y                  | Y                  |
|          |                                                    | there were changes in systematic errors in measurement of the outcome coincident with implementation of the intervention.                                                            | N                  | N                  |
|          |                                                    | Risk of bias judgement                                                                                                                                                               | Low risk           | Low risk           |
| Domain 7 | Bias in selection of the reported result           | Is the reported effect estimate likely to be selected, on the basis of the results, from...7.1. ... multiple outcome measurements within the outcome domain?                         | N                  | N                  |
|          |                                                    | 7.2 ... multiple analyses of the intervention-outcome relationship?                                                                                                                  | N                  | N                  |
|          |                                                    | 7.3 ... different subgroups?                                                                                                                                                         | N                  | N                  |
|          |                                                    | Risk of bias judgement                                                                                                                                                               | Low risk           | Low risk           |
|          |                                                    | Overall bias                                                                                                                                                                         | Some concerns      | Some concerns      |
