# Supplementary material for: Pocket closure and residual pockets after non‐surgical periodontal therapy: A systematic review and meta‐analysis
Source: PubMed Central journal article supplement — J Clin Periodontol. 2021 Nov 11;49(1):2–14. doi: 10.1111/jcpe.13547 (PMC9298904; doi:10.1111/jcpe.13547), 2021-11-11
Supplement: JCPE-49-2-s004.pdf [file JCPE-49-2-s004.pdf]

|                         | Author, Year        | Number or percentage of pockets at baseline | Number or percentage of pockets at final follow up |
|-------------------------|---------------------|---------------------------------------------|----------------------------------------------------|
| <b>PD</b>               |                     |                                             |                                                    |
| % of PD ≤ 3 mm          | Giannelli M, 2015   | %PD ≤ 3 mm: 12.7 ± 2.8%                     | %PD ≤ 3 mm: 37.0 ± 4.6%                            |
|                         | Shiloah J, 2014     | %PD ≤ 3 mm: 58.49 ± 24.39%                  | %PD ≤ 3 mm 65,61% ± 19.60%                         |
|                         | Rosling B 2001      | %PD ≤ 3 mm: 54 ± 23%                        | %PD ≤ 3 mm: 74 ± 19%                               |
|                         | Lindhe J, 1985      | %PD ≤ 3 mm: 33 ± 6%                         | %PD ≤ 3 mm: 80 ± 6%                                |
| <b>% of PD ≥ 4 mm</b>   | Rosa EF. 2011       | %PD ≥ 4 mm: 54,9 ± 25,3%                    | %PD ≥ 4 mm: 21,5 ± 16,1%                           |
|                         | Rosa EF. 2011       | %PD ≥ 4 mm: 47,6 ± 16,9%                    | %PD ≥ 4 mm: 10,2 ± 7,4%                            |
|                         | Westfeld E 1998     | %PD ≥ 4 mm: 54.4 ± 11%                      | %PD ≥ 4 mm: 38 ± 12 %                              |
| <b>% of PD ≥ 5 mm</b>   | Morales A, 2016     | %PD ≥ 5 mm: 5.8 ± 5.6%                      | %PD ≥ 5 mm: 1.8 ± 1.2%;                            |
|                         | Tekce M, 2015       | %PD ≥ 5 mm: 79.94 ± 8.7 %                   | %PD ≥ 5 mm: 48.85 ± 11.52 %                        |
|                         | Gonçalves TED, 2015 | %PD ≥ 5 mm: 21.6 ± 10.4%                    | %PD ≥ 5 mm 7.2 ± 9.5%                              |
|                         | Mestnik MJ, 2012    | %PD ≥ 5 mm: 30.9 ± 11.1%                    | %PD ≥ 5 mm: 16.0 ± 8.8%                            |
|                         | Feres M, 2013       | %PD ≥ 5 mm: 40.8 ± 20.7%                    | %PD ≥ 5 mm: 12.0 ± 11.4 %                          |
|                         | Wan CP, 2009        | %PD ≥ 5 mm: 9.98 ± 9.69 %                   | %PD ≥ 5 mm: 3.37 ± 3.24 %                          |
|                         | Wan CP, 2009        | %PD ≥ 5 mm: 11.43 ± 12.14 %                 | %PD ≥ 5 mm: 0.80 ± 0.94 %                          |
| <b>% of PD 4- 6 mm</b>  | Giannelli M, 2015   | %PD 4-6 mm: 71.1 ± 3.3%                     | %PD 4-6 mm: 60.3 ± 4.4%                            |
|                         | Shiloah J, 2014     | %PD 4-6 mm: 35.36 ± 17.09%                  | %PD 4-6 mm: 30.54 ± 17.99%                         |
|                         | Rosling B 2001      | %PD 4 - 6 mm: 28 ± 18%                      | %PD 4 - 6 mm: 21 ± 14%                             |
|                         | Lindhe J, 1985      | %PD 4 - 6 mm: 42 ± 5%                       | %PD 4 - 6 mm: 20 ± 3%                              |
| <b>% of PD ≥ 6 mm</b>   | Morales A, 2016     | %PD ≥ 6 mm: 1.8 ± 3.0%                      | %PD ≥ 6 mm: 0.7 ± 1.2%;                            |
|                         | Tekce M, 2015       | %PD ≥ 6 mm: 47.42 ± 5.55%                   | %PD ≥ 6 mm: 14.1 ± 6.38%;                          |
| <b>% of PD ≥ 7 mm</b>   | Giannelli M, 2018   | %PD ≥ 7: 12.9 ± 2.5%                        | %PD ≥ 7: 5.7 ± 1.5%                                |
|                         | Morales A, 2016     | %PD ≥ 7 mm: 1.0 ± 2.2%                      | %PD ≥ 7 mm: 0.3 ± 0.5%;                            |
|                         | Tekce M, 2015       | %PD ≥ 7: 16.12 ± 6.52 %                     | %PD ≥ 7: 1.73 ± 2.4 %                              |
|                         | Giannelli M, 2015   | %PD ≥ 7 mm: 16.0 ± 1.7%                     | %PD > 6 mm: 2.6 ± 0.8%                             |
|                         | Gonçalves TED, 2015 | %PD ≥ 7 mm: 8.0 ± 7.1%                      | %PD ≥ 7 mm: 1.9 ± 3.4%                             |
|                         | Shiloah J, 2014     | %PD ≥ 7mm: 5.84 ± 9.23%                     | %PD ≥ 7 mm: 3,79 ± 6,09%                           |
|                         | Rosling B 2001      | %PD ≥ 7 mm: 18 ± 11%                        | %PD ≥ 7 mm: 5 ± 7%                                 |
|                         | Lindhe J, 1985      | %PD ≥ 7 mm: 25 ± 3%                         | %PD ≥ 7 mm: 5 ± 2%                                 |
| <b>No. of PD ≥ 5 mm</b> | Cosgarea R, 2017    | PD ≥ 5mm: 41.73 ± 19.91                     | PD ≥ 5mm: 10.50 ± 6.85                             |
|                         | Borges I, 2017      | PD ≥ 5 mm: 35.6 ± 20.7                      | PD ≥ 5 mm: 19.0 ± 14.5;                            |
| <b>No. of PD ≥ 6 mm</b> | Cosgarea R, 2017    | PD ≥ 6mm: 25.50 ± 17.36                     | PD ≥ 6mm: 5.19 ± 3.71;                             |
|                         | Borges I, 2017      | PD ≥ 6 mm: 22.5 ± 15.2;                     | PD ≥ 6 mm: 11.0 ± 11.5;                            |
| <b>No. of PD ≥ 7 mm</b> | Baelum V, 2016      | PD ≥ 7 mm 3.3 ± 6.6                         | PD ≥ 7: 0.8 ± 5.4                                  |
|                         | Borges I, 2017      | PD ≥ 7 mm: 11.7 ± 9.3                       | PD ≥ 7 mm: 5.4 ± 5.9                               |
