# Supplementary material for: Pocket closure and residual pockets after non‐surgical periodontal therapy: A systematic review and meta‐analysis
Source: PubMed Central journal article supplement — J Clin Periodontol. 2021 Nov 11;49(1):2–14. doi: 10.1111/jcpe.13547 (PMC9298904; doi:10.1111/jcpe.13547), 2021-11-11
Supplement: JCPE-49-2-s005.pdf [file JCPE-49-2-s005.pdf]

|                                                                                                                 |                                                                                                                                                                               | Giannelli et al. 2018                            | Borges et al. 2017 | Cosgarea et al 2017 | Morales et al. 2016 | Tekce et al. 2015 | Sanz et al. 2015 | Giannelli et al. 2015                            | Shiloah et al 2014 | Feres et al 2013 | Mestnik et al 2012 | Sampaio et al. 2011 | Jonsson et al 2010 | Yen et al 2008 | Serino et al 2001 | Westfelt et al. 1998 | Timmerman et al. 1996                            | Sato et al 1993 | Becker et al. 1988                               | Lindhe et al. 1985                               |                                                  |
|-----------------------------------------------------------------------------------------------------------------|-------------------------------------------------------------------------------------------------------------------------------------------------------------------------------|--------------------------------------------------|--------------------|---------------------|---------------------|-------------------|------------------|--------------------------------------------------|--------------------|------------------|--------------------|---------------------|--------------------|----------------|-------------------|----------------------|--------------------------------------------------|-----------------|--------------------------------------------------|--------------------------------------------------|--------------------------------------------------|
|                                                                                                                 | <b>References</b>                                                                                                                                                             |                                                  |                    |                     |                     |                   |                  |                                                  |                    |                  |                    |                     |                    |                |                   |                      |                                                  |                 |                                                  |                                                  |                                                  |
|                                                                                                                 | Type of study                                                                                                                                                                 | split mouth randomized controlled clinical trial | parallel RCT       | parallel RCT        | parallel RCT        | parallel RCT      | parallel RCT     | split mouth randomized controlled clinical trial | parallel RCT       | parallel RCT     | parallel RCT       | parallel RCT        | parallel RCT       | parallel RCT   | parallel RCT      | parallel RCT         | split mouth randomized controlled clinical trial | parallel RCT    | split mouth randomized controlled clinical trial | split mouth randomized controlled clinical trial | split mouth randomized controlled clinical trial |
| Domain 1: Risk of bias due to randomization                                                                     | <b>1.1 Was the allocation sequence random?</b>                                                                                                                                | Y                                                | Y                  | Y                   | Y                   | Y                 | Y                | Y                                                | Y                  | Y                | Y                  | Y                   | Y                  | Y              | NI                | NI                   | PY                                               | PY              | NI                                               | NI                                               |                                                  |
|                                                                                                                 | <b>1.2 Was the allocation sequence concealed until participants were enrolled and assigned to interventions?</b>                                                              | Y                                                | Y                  | NI                  | Y                   | Y                 | Y                | Y                                                | Y                  | Y                | Y                  | Y                   | PY                 | Y              | NI                | NI                   | NI                                               | PY              | NI                                               | NI                                               |                                                  |
|                                                                                                                 | <b>1.3 Did baseline differences between intervention groups suggest a problem with the randomization process?</b>                                                             | N                                                | N                  | N                   | N                   | N                 | N                | N                                                | N                  | N                | N                  | N                   | N                  | N              | N                 | NI                   | N                                                | PN              | N                                                | N                                                |                                                  |
|                                                                                                                 | <b>Risk-of-bias judgement</b>                                                                                                                                                 | Low Risk                                         | Low Risk           | Low risk            | Low Risk            | Low Risk          | Low Risk         | Low Risk                                         | Low Risk           | Low Risk         | Low Risk           | Low Risk            | Low Risk           | Low risk       | Low Risk          | Some concerns        | Some concerns                                    | Low Risk        | Low Risk                                         | Some concerns                                    | Some concerns                                    |
| Domain 2: Risk of bias due to deviations from the intended interventions (effect of assignment to intervention) | <b>2.1. Were participants aware of their assigned intervention during the trial?</b>                                                                                          | N                                                | N                  | N                   | N                   | N                 | PN               | N                                                | N                  | N                | N                  | N                   | N                  | PY             | Y                 | Y                    | PY                                               | Y               | NI                                               | NI                                               |                                                  |
|                                                                                                                 | <b>2.2. Were carers and people delivering the interventions aware of participants' assigned intervention during the trial?</b>                                                | Y                                                | N                  | N                   | N                   | N                 | Y                | Y                                                | N                  | N                | N                  | N                   | Y                  | PN             | Y                 | Y                    | Y                                                | Y               | Y                                                | Y                                                |                                                  |
|                                                                                                                 | <b>2.3. If Y/PY/NI to 2.1 or 2.2: Were there deviations from the intended intervention that arose because of the experimental context?</b>                                    |                                                  |                    |                     |                     |                   |                  | PN                                               |                    |                  |                    |                     |                    | N              |                   | N                    | NI                                               | NI              | NI                                               | NI                                               |                                                  |
|                                                                                                                 | <b>2.4. If Y/PY to 2.3: Were these deviations from intended intervention balanced between groups?</b>                                                                         |                                                  |                    |                     |                     |                   |                  |                                                  |                    |                  |                    |                     |                    |                |                   |                      |                                                  |                 |                                                  |                                                  |                                                  |
|                                                                                                                 | <b>2.5 If N/PN/NI to 2.4: Were these deviations likely to have affected the outcome?</b>                                                                                      |                                                  |                    |                     |                     |                   |                  |                                                  |                    |                  |                    |                     |                    |                |                   |                      |                                                  |                 |                                                  |                                                  |                                                  |
|                                                                                                                 | <b>2.6 Was an appropriate analysis used to estimate the effect of assignment to intervention?</b>                                                                             | PY                                               | PY                 | PY                  | PY                  | PY                | PY               | PY                                               | PY                 | Y                | Y                  | PY                  | PY                 | Y              | PY                | PY                   | PY                                               | PY              | PY                                               | PY                                               | PY                                               |
|                                                                                                                 | <b>2.7 If N/PN/NI to 2.6: Was there potential for a substantial impact (on the result) of the failure to analyse participants in the group to which they were randomized?</b> |                                                  |                    |                     |                     |                   |                  |                                                  |                    |                  |                    |                     |                    |                |                   |                      |                                                  |                 |                                                  |                                                  |                                                  |
| <b>Risk-of-bias judgement</b>                                                                                   | Low risk                                                                                                                                                                      | Low risk                                         | Low risk           | Low risk            | Low risk            | Low risk          | Low risk         | Low risk                                         | Low risk           | Low Risk         | Low Risk           | Low Risk            | Some               | Low Risk       | Low risk          | Low Risk             | Low Risk                                         | Low Risk        | Some                                             | Some                                             |                                                  |
| Domain 3: Missing outcome data                                                                                  | <b>3.1 Were data for this outcome available for all, or nearly all, participants randomized?</b>                                                                              | Y                                                | N                  | N                   | Y                   | Y                 | Y                | Y                                                | N                  | N                | Y                  | Y                   | Y                  | N              | N                 | Y                    | Y                                                | NI              | Y                                                | N                                                |                                                  |
|                                                                                                                 | <b>3.2 If N/PN/NI to 3.1: Is there evidence that result was not biased by missing outcome data?</b>                                                                           |                                                  | N                  | N                   |                     |                   |                  |                                                  | NA                 | N                |                    |                     |                    | PN             | N                 |                      |                                                  | NI              |                                                  | N                                                |                                                  |
|                                                                                                                 | <b>3.3 If N/PN to 3.2: Could missingness in the outcome depend on its true value?</b>                                                                                         |                                                  | NI                 | NI                  |                     |                   |                  |                                                  | PN                 | PN               |                    |                     |                    | PY             | N                 |                      |                                                  | NI              |                                                  | NI                                               |                                                  |
|                                                                                                                 | <b>3.4 If Y/PY/NI to 3.3: Do the proportions of missing outcome data differ between intervention groups?</b>                                                                  |                                                  | N                  | N                   |                     |                   |                  |                                                  |                    |                  |                    |                     |                    | N              | Y                 |                      |                                                  | NI              |                                                  | NI                                               |                                                  |
|                                                                                                                 | <b>3.5 If Y/PY/NI to 3.3: Is it likely that missingness in the outcome depended on its true value?</b>                                                                        |                                                  | PN                 | NI                  |                     |                   |                  |                                                  |                    |                  |                    |                     |                    | NI             | N                 |                      |                                                  | PN              |                                                  | NI                                               |                                                  |
|                                                                                                                 | <b>Risk-of-bias judgement</b>                                                                                                                                                 | Low risk                                         | Some               | Some                | Low risk            | Low risk          | Low risk         | Low risk                                         | Low risk           | Low risk         | Low Risk           | Low Risk            | Low Risk           | Low risk       | Some              | Low risk             | Low risk                                         | Low Risk        | Some                                             | Low risk                                         | High risk                                        |
| Domain 4: Risk of bias in measurement of the outcome                                                            | <b>4.1 Was the method of measuring the outcome inappropriate?</b>                                                                                                             | N                                                | N                  | N                   | N                   | N                 | N                | N                                                | N                  | N                | N                  | N                   | N                  | N              | N                 | N                    | N                                                | N               | N                                                | N                                                |                                                  |
|                                                                                                                 | <b>4.2 Could measurement or ascertainment of the outcome have differed between intervention groups ?</b>                                                                      | N                                                | N                  | N                   | N                   | N                 | N                | N                                                | N                  | N                | N                  | N                   | N                  | N              | N                 | N                    | N                                                | N               | N                                                | N                                                |                                                  |
|                                                                                                                 | <b>4.3 If N/PN/NI to 4.1 and 4.2: Were outcome assessors aware of the intervention received by study participants ?</b>                                                       | N                                                | N                  | N                   | N                   | N                 | N                | N                                                | N                  | N                | N                  | N                   | N                  | N              | N                 | NI                   | NI                                               | N               | NI                                               | Y                                                | NI                                               |
|                                                                                                                 | <b>4.4 If Y/PY/NI to 4.3: Could assessment of the outcome have been influenced by knowledge of intervention received?</b>                                                     |                                                  |                    |                     |                     |                   |                  |                                                  |                    |                  |                    |                     |                    |                |                   | NI                   | PY                                               |                 | PY                                               | Y                                                | NI                                               |
|                                                                                                                 | <b>4.5 If Y/PY/NI to 4.4: Is it likely that assessment of the outcome was influenced by knowledge of intervention received?</b>                                               |                                                  |                    |                     |                     |                   |                  |                                                  |                    |                  |                    |                     |                    |                |                   | NI                   | PY                                               |                 | PY                                               | Y                                                | NI                                               |
|                                                                                                                 | <b>Risk-of-bias judgement</b>                                                                                                                                                 | Low risk                                         | Low risk           | Low risk            | Low risk            | Low risk          | Low risk         | Low risk                                         | Low risk           | Low risk         | Low Risk           | Low Risk            | Low Risk           | Low Risk       | Low Risk          | High risk            | High Risk                                        | Low Risk        | High risk                                        | High risk                                        | High risk                                        |
| Domain 5: Risk of bias in selection of the reported result                                                      | <b>5.1 Was the trial analysed in accordance with a pre-specified plan that was finalized before unblinded outcome data were available for analysis ?</b>                      | NI                                               | NI                 | NI                  | NI                  | NI                | NI               | NI                                               | NI                 | NI               | NI                 | NI                  | NI                 | NI             | NI                | NI                   | NI                                               | NI              | NI                                               | NI                                               |                                                  |
|                                                                                                                 | <b>Is the numerical result being assessed likely to have been selected, on the basis of the results, from...</b>                                                              |                                                  |                    |                     |                     |                   |                  |                                                  |                    |                  |                    |                     |                    |                |                   |                      |                                                  |                 |                                                  |                                                  |                                                  |
|                                                                                                                 | <b>5.2 ... multiple outcome measurements (e.g. scales, definitions, time points) within the outcome domain?</b>                                                               | PN                                               | PN                 | PN                  | PN                  | PN                | PN               | PN                                               | PN                 | PN               | PN                 | PN                  | PN                 | PN             | N                 | PN                   | PN                                               | PN              | N                                                | N                                                |                                                  |
|                                                                                                                 | <b>5.3 ... multiple analyses of the data?</b>                                                                                                                                 | PN                                               | PN                 | PN                  | PN                  | PN                | PN               | PN                                               | PN                 | PN               | PN                 | PN                  | PN                 | PN             | PN                | N                    | PN                                               | PN              | PN                                               | N                                                | N                                                |
|                                                                                                                 | <b>Risk-of-bias judgement</b>                                                                                                                                                 | Some                                             | Some               | Some                | Some                | Some              | Some             | Some                                             | Some               | Some             | Some               | Some                | Some               | Some           | Some              | Some                 | Some                                             | Some            | Some                                             | Some                                             | Some                                             |
| <b>Overall risk of bias</b>                                                                                     | <b>Risk-of-bias judgement</b>                                                                                                                                                 | Some                                             | Some               | Some                | Some                | Some              | Some             | Some                                             | Some               | Some             | Some               | Some                | Some               | Some           | Some              | High risk            | High risk                                        | Some            | High risk                                        | High risk                                        | High risk                                        |
